# Supplementary material for: Chemical equilibrium study in the reacting system of (1-alkoxyethyl)benzene synthesis from isoalkanols and styreneElectronic supplementary information (ESI) available: experimentally determined compositions of equilibrium mixtures in the reactions of alkanols with styrene; results of combustion experiments. See http://www.rsc.org/suppdata/p2/b2/b200312k/
Source: Royal Society of Chemistry journal article supplement (doi:10.1039/b200312k), 2002-03-06
Supplement: b200312k.doc [file b200312k.doc]

Supplementary data

Table 1. The system iso-propanol + styrene  (1-iso-propoxy-ethyl)-benzene. Experimentally determined composition of equilibrium mixtures (including mole fractions of byproducts) and *K*x–values in the liquid phase, calculated from eq. (4). (*T* is the temperature of investigation; n is number of determinations of composition within the time of equilibrium study; *xi* is the mole fraction measured chromatographically)

| *T/*K | n | *x*iPrOH | *x*Styrene | *x*iPrEB | *x*Propene | *x*iPrOiPr | *K*x a |
| --- | --- | --- | --- | --- | --- | --- | --- |
|  | 10 | 0.1958 | 0.2050 | 0.5681 | - | 0.0311 | 14.20.17 |
| 343.1 | 11 | 0.5228 | 0.1476 | 0.3028 | - | 0.0268 | 3.90.12 b |
|  | 9 | 0.7489 | 0.0479 | 0.1793 | - | 0.0239 | 4.20.11 b |
|  | 11 | 0.8321 | 0.0353 | 0.1134 | - | 0.0192 | 3.90.12 b |
|  | 8 | 0.1665 | 0.2391 | 0.2251 | 0.0980 | 0.2713 | 6.00.15 |
|  | 9 | 0.2396 | 0.2211 | 0.2511 | 0.0788 | 0.2102 | 4.70.13 |
|  | 9 | 0.3520 | 0.1761 | 0.3288 | 0.0505 | 0.0926 | 3.30.14 b |
| 353.1 | 9 | 0.4383 | 0.1877 | 0.2676 | 0.0321 | 0.0823 | 3.10.08 b |
|  | 8 | 0.5693 | 0.1042 | 0.2075 | 0.0298 | 0.0891 | 3.30.12 b |
|  | 7 | 0.6638 | 0.0778 | 0.1700 | 0.0206 | 0.0680 | 3.30.16 b |
|  | 9 | 0.7490 | 0.0518 | 0.1286 | 0.0175 | 0.0531 | 3.30.21 b |
|  | 11 | 0.8126 | 0.0294 | 0.0824 | 0.0132 | 0.0412 | 3.40.15 b |
|  | 10 | 0.2912 | 0.3602 | 0.2197 | 0.0311 | 0.0979 | 2.10.05 b |
| 373.1 | 8 | 0.5733 | 0.1401 | 0.1863 | 0.0265 | 0.0738 | 2.30.09 b |
|  | 9 | 0.6924 | 0.0985 | 0.1473 | 0.0226 | 0.0391 | 2.20.08 b |
|  | 7 | 0.7921 | 0.0610 | 0.1025 | 0.0178 | 0.0365 | 2.20.04 b |
| 403.1 | 8 | 0.4800 | 0.1856 | 0.1277 | 0.0540 | 0.1527 | 1.40.12 b |
|  | 7 | 0.6384 | 0.1034 | 0.0930 | 0.0481 | 0.1271 | 1.40.02 b |
|  | 9 | 0.7266 | 0.0774 | 0.0723 | 0.0397 | 0.0840 | 1.30.04 b |
| 423.1 | 8 | 0.4172 | 0.2541 | 0.1071 | 0.0816 | 0.1400 | 1.00.05 b |
|  | 8 | 0.5187 | 0.1837 | 0.0991 | 0.0741 | 0.1244 | 1.00.03 b |

a Uncertainity is the standard deviation

b Values involved in the determination of the enthalpy of reaction.

Table 2. The system sec-butanol + styrene  (1-sec-butoxy-ethyl)-benzene. Experimentally determined composition of equilibrium mixtures (including mole fractions of byproducts) and *K*x–values in the liquid phase, calculated from eq. (4). (*T* is the temperature of investigation; n is number of determinations of composition within the time of equilibrium study; *xi* is the mole fraction measured chromatographically)

| *T/*K | n | *x*s-BuOH | *x*Styrene | *x*sBuEB(dl) | *x*sBuEB(meso) | *x*Butenes | *x*sBuOsBu | *K*x a | *K*x a,b,c |
| --- | --- | --- | --- | --- | --- | --- | --- | --- | --- |
|  | 6 | 0.1613 | 0.2212 | 0.1703 | 0.1533 | 0.2495 | 0.0444 | 4.80.17 | 1.110.02 |
|  | 5 | 0.2226 | 0.1837 | 0.1531 | 0.1308 | 0.2757 | 0.0341 | 3.70.12 | 1.100.03 |
|  | 8 | 0.3501 | 0.1733 | 0.1439 | 0.1297 | 0.1729 | 0.0301 | 2.40.11 c | 1.110.04 |
| 353.1 | 6 | 0.4483 | 0.1399 | 0.1426 | 0.1284 | 0.1225 | 0.0172 | 2.30.12 c | 1.110.06 |
|  | 4 | 0.6344 | 0.0711 | 0.1025 | 0.0940 | 0.0829 | 0.0151 | 2.30.15 c | 1.090.05 |
|  | 9 | 0.7405 | 0.0433 | 0.0761 | 0.0684 | 0.0573 | 0.0144 | 2.40.12 c | 1.110.05 |
|  | 6 | 0.8823 | 0.0212 | 0.0433 | 0.0389 | 0.0242 | 0.0099 | 2.30.09 c | 1.110.04 |
| 373.1 | 8 | 0.1936 | 0.2243 | 0.0853 | 0.0774 | 0.3843 | 0.0351 | 2.00.05 | 1.080.02 |
|  | 8 | 0.4378 | 0.1716 | 0.1098 | 0.1017 | 0.1587 | 0.0204 | 1.50.08 c | 1.080.02 |
|  | 7 | 0.5212 | 0.1303 | 0.0996 | 0.0922 | 0.1408 | 0.0159 | 1.50.05 c | 1.080.05 |
| 393.1 | 7 | 0.2257 | 0.3326 | 0.0745 | 0.0702 | 0.2595 | 0.0375 | 1.00.04 c | 1.060.06 |
|  | 7 | 0.3544 | 0.1885 | 0.0639 | 0.0602 | 0.2991 | 0.0239 | 1.00.05 c | 1.060.04 |
|  | 7 | 0.5512 | 0.1003 | 0.0555 | 0.0529 | 0.2216 | 0.0185 | 1.00.06 c | 1.050.05 |
| 413.1 | 8 | 0.1584 | 0.3054 | 0.0421 | 0.0413 | 0.4002 | 0.0526 | 0.870.06 | 1.020.04 |
|  | 7 | 0.2570 | 0.3275 | 0.0649 | 0.0636 | 0.2547 | 0.0323 | 0.770.08 c | 1.020.08 |
| 433.1 | 9 | 0.2791 | 0.1833 | 0.0332 | 0.0331 | 0.4550 | 0.0164 | 0.650.09 c | 1.000.05 |

a Uncertainity is the standard deviation

b Reaction of isomerization with *K*x = *x*sBuEB(S*R*)/ *x*sBuEB(S*S*)

c Values involved in the determination of the enthalpy of reaction.

Table 3. The system cyclohexanol + styrene  (1-cyclohexyl-oxy-ethyl)-benzene. Experimentally determined composition of equilibrium mixtures (including mole fractions of byproducts) and *K*x–values in the liquid phase, calculated from eq. (4). (*T* is the temperature of investigation; n is number of determinations of composition within the time of equilibrium study; *xi* is the mole fraction measured chromatographically)

| *T/*K |  | *x*cHexOH | *x*Styrene | *x*cHexEB | *x*Cyclohexene | *K*x a |
| --- | --- | --- | --- | --- | --- | --- |
|  | 8 | 0.1812 | 0.2262 | 0.3474 | 0.2451 | 8.50.22 |
|  | 6 | 0.2345 | 0.2008 | 0.3060 | 0.2585 | 6.50.21 |
|  | 7 | 0.3312 | 0.1658 | 0.2844 | 0.2186 | 5.20.18 b |
|  | 7 | 0.4041 | 0.1288 | 0.2653 | 0.2018 | 5.10.17 b |
| 353.1 | 8 | 0.5400 | 0.0801 | 0.2256 | 0.1543 | 5.20.15 b |
|  | 9 | 0.6618 | 0.0552 | 0.1953 | 0.0877 | 5.30.15 b |
|  | 6 | 0.7822 | 0.0371 | 0.1513 | 0.0294 | 5.20.12 b |
|  | 8 | 0.8322 | 0.0230 | 0.1011 | 0.0437 | 5.30.18 b |
| 373.1 | 6 | 0.2056 | 0.3070 | 0.2664 | 0.2209 | 4.20.10 |
|  | 8 | 0.4074 | 0.1592 | 0.2250 | 0.2083 | 3.50.11 b |
|  | 9 | 0.5311 | 0.1001 | 0.1856 | 0.1832 | 3.50.15 b |
| 393.1 | 7 | 0.1685 | 0.3868 | 0.2204 | 0.2243 | 3.40.12 |
|  | 5 | 0.2688 | 0.2161 | 0.1585 | 0.3537 | 2.70.09 b |
|  | 6 | 0.3318 | 0.2243 | 0.1996 | 0.2442 | 2.70.15 b |
|  | 8 | 0.5367 | 0.1201 | 0.1838 | 0.1594 | 2.90.10 b |
| 413.1 | 6 | 0.1672 | 0.3960 | 0.1320 | 0.3048 | 2.00.08 b |
|  | 8 | 0.2291 | 0.2659 | 0.1314 | 0.3736 | 2.10.09 b |
|  | 9 | 0.5833 | 0.0913 | 0.1066 | 0.2188 | 2.00.11 b |

a Uncertainity is the standard deviation

b Values involved in the determination of the enthalpy of reaction.

Table 4. Results for s typical combustion experiment at T = 298.15 K (p° = 0.1 MPa)a

|  | (1-isopropoxy-ethyl)-benzene |
| --- | --- |
| m (substance) /g b | 0.31450 |
| m' (cotton) /g b | 0.00091 |
| m'' (polythen) /g b | 0.21156 |
| Tc /Kc | 1.4412 |
| (calor)·(-*T*c) /J | -22044.59 |
| Ucorr. /Jd | 10.20 |
| -m'·cu' /J | 15.42 |
| - m''·cu'' /J | 9808.13 |
| cu° (substance) /(J·g-1) | -38809.0 |

a For the definition of the symbols see reference 8; *V*bomb = 0.3289 dm3; *p*igas = 3.04 MPa; *m*iwater = 1.00 g; *E*ignition. = 5.4 J; *m*platin=9.64 g; b Masses obtained from apparent masses. c Tc = Tf - Ti + Tcorr.; d Ucorr, the correction to standard state is the sum of items 81 to 85, 87 to 90, 93, and 94 in Hubbard et al.8

Table 5. Summary of experimental energies of combustion of (1-isopropoxy-ethyl)-benzene and standard molar thermodynamic functions at T = 298.15 K (p*°* = 0.1 MPa).

(1-isopropoxy-ethyl)-benzene

[(cu°)(1-isopropoxy-ethyl)-benzene, l, 298.15 K ]/(J·g-1)

| -38794.4 | -38809.0 | -38791.0 | -38797.3 | -38801.5 | -38808.9 |
| --- | --- | --- | --- | --- | --- |

| -cu°/(J·g-1) | -38800.4±3.1 |
| --- | --- |
| (l)/(kJ·mol-1) | -6381.6±2.5 |
| (l)/(kJ·mol-1) | -233.6±2.9 |
